# Supplementary material
Source: PubMed Central journal article supplement (PMC3910623)

# Supporting Information

Natarajan et al. 10.1073/pnas.1311945111

## SI Materials and Methods

**Cells.** Rat embryo fibroblast (REF52) cells and 293FT (Invitrogen) cells were maintained in DMEM supplemented with 10% (vol/vol) FBS, 1 mM sodium pyruvate, 10 mM Hepes buffer, 55 nM  $\beta$ -mercaptoethanol, and antibiotics.

**Lentiviral Transduction.** Lentiviral stocks were prepared using the 293T packaging cell line. Cells were plated overnight without antibiotics so that they were 90% confluent at the time of transfection. Lentiviral packaging plasmids consisting of a mixture of pGag-pol, pRev, and VSVG (obtained from System Biosciences) were mixed with the desired target lentiviral construct and used to transfect 293FT cells using Lipofectamine 2000 (Invitrogen) according to the manufacturer's protocol. Virus-containing supernatants were collected from cell cultures at 48 h and 72 h posttransfection, filtered, and stored at  $-70^{\circ}\text{C}$ . For lentiviral infection, target cells were incubated with viral supernatants supplemented with 4  $\mu\text{g}/\text{mL}$  polybrene (Sigma), and media was replaced after 6 h.

**Development of 293-NF- $\kappa$ B-GFP Reporter Cells.** A basic single-color lentiviral transcriptional reporter (TR) vector, pRTR-mCMV-copGFP with destabilized copGFP reporter gene under the control of minimal CMV (mCMV) promoter, was used for construction of the NF- $\kappa$ B-293FT-TR cell line. The lentiviral NF- $\kappa$ B-responsive reporter construct pTR-NF- $\kappa$ B-mCMV-copGFP was constructed by cloning four repeats of the 10-bp NF- $\kappa$ B consensus response element upstream of the mCMV promoter and destabilized copGFP reporter gene in the TR vector pRTR-mCMV-copGFP (Fig. S1). This NF- $\kappa$ B reporter construct was packaged as lentiviral particles and used to infect 293T cells to establish NF- $\kappa$ B reporter cells. Functionality of the NF- $\kappa$ B GFP reporter in these cells was assessed by measuring their GFP expression level by FACS following TNF treatment. To reduce the impact of cell-to-cell variability in the intensity of reporter induction, we sorted single cells with "high" GFP expression ( $\sim 300$ -fold after TNF induction) by FACS, propagated the clones, and then reanalyzed GFP expression by FACS with and without TNF induction. The resulting NF- $\kappa$ B TR cell clone demonstrated a very low basal level of reporter activity and robust, uniform reporter induction after treatment with TNF and IL-1 cytokines (5 ng/mL) (Peprotech, Inc.). This cell line was therefore used as the reporter cell line in this study (referred to as 293-NF- $\kappa$ B-GFP) (Fig. S2).

**Development of Lentiviral Peptide Libraries.** To have a source of genetic elements for selection of peptide modulators of NF- $\kappa$ B activity, we constructed pooled peptide-encoding libraries based on a high-throughput (HT) synthesis of oligonucleotides on microarray surfaces. We assembled coding sequences of  $\sim 5,000$  human and mouse cell-surface, secreted, extracellular-matrix proteins using key-word search [Medical Subject Headings (MeSH) terms] in the National Library of Medicine database. For each coding region, we designed overlapping fragments of cDNA encoding either 20 aa or 50 aa flanked with BbsI sites. A pool of  $\sim 50,000$  oligonucleotides was synthesized on the surface of glass slides (55,000 Agilent custom microarrays). We amplified the pool of oligonucleotides by PCR (12 cycles) using primers complementary to common flanking sequences. The amplified peptide cassettes were digested with BbsI, and each oligonucleotide pool was cloned into the set of three lentiviral extracellular peptide expression vectors, constructed as follows. A cassette

comprising the signal sequence of alkaline phosphatase (SEAP) was cloned into the lentiviral vector pR-CMV to generate pR-BAP for expression of bioactive peptides. pR-BAP was designed to include internal BbsI sites to allow direct cloning of the peptide library and to introduce additional cassettes coding for the expression of peptides directing dimerization (RMKQLEDKIEELLSKIYHLENEIARLKKLIGER) or trimerization (RMKQIEDKIEELLSKIYHIENEIARIKKLIGER). The peptide expression cassette is flanked by Gex1, Gex2, and GexSeq primer-binding sites to allow PCR amplification and HT sequencing using the Solexa platform. Lentiviral peptide libraries were packaged using standard procedures (see *Lentiviral Transduction* section).

**High-Throughput Sequencing.** To identify peptide modulators, genomic DNA was isolated from control [NF- $\kappa$ B-activating selectable peptide (NASP) library-transduced cells] and GFP-positive cells after each round of FACS and used for the amplification of the peptide cassette using flanking Gex primers. HT Solexa sequencing was used to identify the amplified fragments. We have optimized the protocols for amplification and HT sequencing in the course of our preliminary studies and obtained about  $5 \times 10^6$  reads from each sample, averaging about 100 reads for each peptide in the library. To assess the reproducibility of these data, each HTS screen was repeated with the specific 50,000 peptide NASP library thrice. Statistical analysis was performed using SPSS v15.0 for Windows and in-house software developed at Collecta Inc., to identify a set of peptide candidates from the sequencing data. We identified  $\sim 50$  NF- $\kappa$ B-activating candidate peptides that were enriched at least three-fold in the sorted cell fractions in at least two duplicate screens. Of the designs tested, leucine zipper dimeric and trimeric NASP libraries produced the largest number of hits and demonstrated the highest potency in our assay. In addition, we found that NASP libraries comprising 20-aa-long peptides or 50-aa-long peptides demonstrated similar efficiencies of hit isolation.

**Immunoprecipitation.** For coimmunoprecipitation (co-IP) experiments, the cells expressing different flag-tagged versions of ApoF NASPs were lysed with radio immunoprecipitation assay (RIPA) buffer without SDS, and anti-FLAG agarose (Sigma) was used to pull down interacting proteins (Sigma; A4596, ANTI-FLAG M1 Agarose Affinity Gel). Immunoprecipitated ApoF-NASPs were detected on Western blot using anti-FLAG antibodies (Sigma; A8592, Monoclonal ANTI-FLAG M2-Peroxidase). Coimmunoprecipitated TRAF6 was detected using anti-TRAF6 antibodies (Santa Cruz Biotech; sc-7221, H-274).

**Oncogene Cooperation Assays.** Early passage wild-type mouse embryonic fibroblasts (MEFs) (passage 3) were plated in 60-cm dishes 1 d before transfection with lentiviruses encoding individual peptides or with the empty lentiviral vector used for library construction. After 48 h, each population was trypsinized, and the cells were divided equally between three plates. One plate served as a control to test the effect of peptide alone, and the other two plates were used to test the effect of the peptide in combination with oncogenic Ras expression. Thus, the second plate was transduced with the lentiviral PLV-rasV12-bleo construct (encoding H-Ras<sup>V12</sup>), and the third plate was transduced with the empty vector PLV-bleo. For positive controls, p53<sup>-/-</sup> MEF cells were infected in parallel. Cells transduced with PLV-rasV12-bleo or PLV-bleo were subjected to selection in bleomycin





**ApoF** : ref|NP\_001629.1| apolipoprotein F precursor [Homo sapiens]

```

aa120                                     aa200
QVLIQHRLRGLQKGRSTERNVSVEALASALQLLAREQQSTGRVGRSLPTEDCENEKEQAVHNVVQLLPVGVTFFYNLTALY
      (ApoF-T20) RVGRSLPTEDCENEKEQAVH
      (ApoF-T50) LLAREQQSTGRVGRSLPTEDCENEKEQAVHNVVQLLPVGVTFFYNLTALY
QVLIQHRLRGLQKGRSTERNVSVEALASALQLLAREQQSTGRVGRSLPTED (ApoF-D50)
QVLIQHRLRGLQKGRSTERNVS-----GRVGRSLPTED (ApoF-D50-del)

```

**COMP**: ref|NP\_000086.2| cartilage oligomeric matrix protein precursor [Homo sapiens]

```

aa431                                     aa517
DSDQDQDGDGHQDSRDNCPTVPNSAQEDSDHDGQGDACDDDDNDGVPDSRDNCRLVPNPGQEDADRQGVGDVCQDDFDADKVVVK
      HQDSRDNCPTVPNSAQEDSD (COMP T20)
DSDQDQDGDGHQDSRDNCPTVPNSAQEDSDHDGQGDACDDDDNDGVPDS (COMP-T50)

```

**PLP**: |gb|AAH25784.1| Pancreatic lipase-related protein 1 [Homo sapiens]

```

aa171                                     aa257
SLGAHVAGEAGSKTPGLSRITGLDPVEASFESTPEEVRLDPSDADFVDVIHTDAAPLIPFLFGFTNQQMGLDFFPNGGESMPGCK
SLGAHVAGEAGSKTPGLSRITGLDPVEASFESTPEEVRLDPSDADFVDVI (PLP-T50)
GSKTPGLSRITGLDPVEASFESTPEEVRLDPSDADFVDVIHTDAAPLIP (PLP-D50)

```

**Fig. S4.** Sequence alignment of overlapping NASPs of apolipoprotein F (ApoF), pancreatic lipase-related protein (PLP), and cartilage oligomeric matrix protein (COMP) with a fragment of corresponding protein.

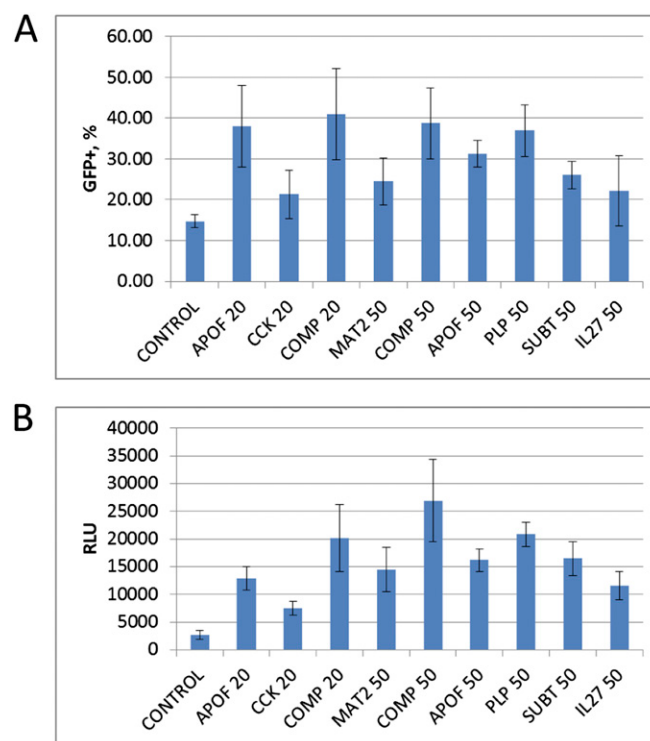

**Fig. S5.** Validation of individual NASPs in NF- $\kappa$ B reporter assays. (A) Individual NASPs induce GFP expression in HeLa-NF- $\kappa$ B-GFP reporter cells. HeLa-NF- $\kappa$ B-GFP cells were transduced with individual NASP lentiviral constructs, and the percentage of GFP-positive cells in each population was determined by flow cytometry 48 h after transduction. (B) Luciferase induction in MEF-NF- $\kappa$ B-Luc reporter cells transduced with individual NASP lentiviral constructs. MEF-NF- $\kappa$ B-Luc cells were transduced with individual NASPs and subjected to Luciferase assay 48 h after transduction.

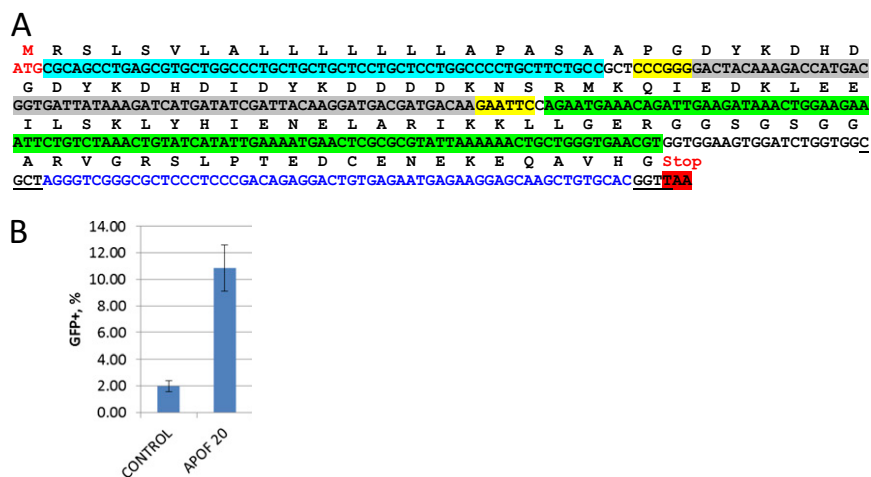

Supplement: 1311945111_pnas.201311945SI.pdf [file 1311945111_pnas.201311945SI.pdf]
